# Supplementary material
Source: Springer Nature journal article supplement (https://www.springermedizin.de/resource/supplementary/12990_2009_249_MOESM4_ESM.pdf/9612884)

A

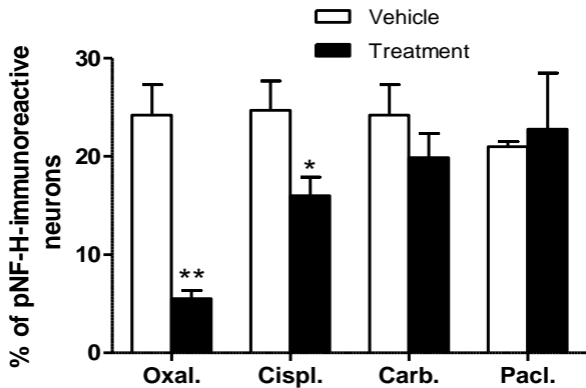

B

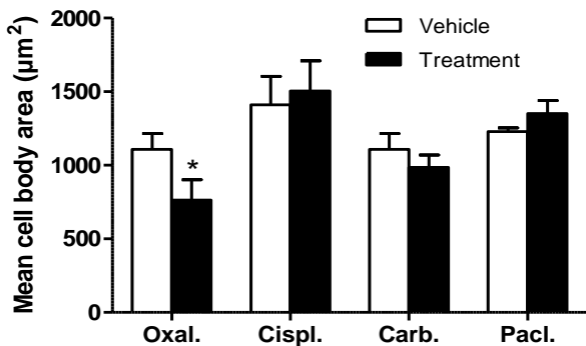

Supplement: MOESM4 [file 9612884]
